# Supplementary material
Source: PubMed Central journal article supplement (PMC7013266)
Supplement: baADV2019000919-suppl1.pdf [file baADV2019000919-suppl1.pdf]

## **Supplemental Methods**

**Generation of Molm14 FLT3 mutant cell lines.** The *FLT3*-ITD-positive parental Molm14 cells were a gift from Dr. Scott Kogan in 2008. Cell lines resistant to quizartinib were generated either by culturing parental Molm14 cells in liquid RPMI media containing escalating doses of quizartinib (0.5nM to 20nM) or by plating cells in RPMI media with 20% FCS in soft agar in the presence of 20nM quizartinib. Resistant cells generated in liquid media were sub-cloned prior to Sanger sequencing. Resistant cells generated in soft agar were expanded in liquid media supplemented with 20nM quizartinib before sequencing. In each case, the *FLT3* KD was sequenced to confirm acquisition of indicated *FLT3* mutations.

**Molm14 Cell-Viability Assay.** Molm14 parental and *FLT3* mutant cells were plated in 0.1 to 1000nM quizartinib or gilteritinib in triplicate and expanded for 2 days. Viability was assessed and IC50 values were calculated as previously described<sup>12</sup>.

| Table S1: Summary of FLT3 Mutation IC50 Values in Ba/F3 Cells |                |                   |    |                                                                               |
|---------------------------------------------------------------|----------------|-------------------|----|-------------------------------------------------------------------------------|
| Mutation                                                      | Mean IC50 (nM) | Std Dev IC50 (nM) | N  | Mutation Location (in native FLT3, ITD, or ITD D835V background as indicated) |
| ITD                                                           | 1.81           | 0.63              | 30 | TKD Mutations (activation loop)                                               |
| D835F                                                         | 0.98           | 0.03              | 3  | TKD Mutations (not in activation loop)                                        |
| D835V                                                         | 0.67           | 0.16              | 3  | EC Domain Mutation (crenolanib-resistant)                                     |
| D835Y                                                         | 0.68           | 0.07              | 3  |                                                                               |
| D839G                                                         | 0.99           | 0.09              | 3  |                                                                               |
| I836del                                                       | 1.65           | 0.37              | 3  |                                                                               |
| N676K                                                         | 0.65           | 0.17              | 3  |                                                                               |
| N841I                                                         | 1.55           | 0.17              | 3  |                                                                               |
| N841T                                                         | 1.54           | 0.13              | 3  |                                                                               |
| N841Y                                                         | 0.93           | 0.05              | 3  |                                                                               |
| R845S                                                         | 1.05           | 0.33              | 3  |                                                                               |
| Y842C                                                         | 1.72           | 0.31              | 3  |                                                                               |
| ITD A848P                                                     | 2.33           | 0.30              | 3  |                                                                               |
| ITD D698N                                                     | 31.54          | 5.72              | 3  |                                                                               |
| ITD D835A                                                     | 1.32           | 0.50              | 3  |                                                                               |
| ITD D835del                                                   | 4.20           | 2.32              | 3  |                                                                               |
| ITD D835E                                                     | 1.37           | 0.35              | 3  |                                                                               |
| ITD D835F                                                     | 1.24           | 0.36              | 3  |                                                                               |
| ITD D835G                                                     | 2.29           | 1.46              | 3  |                                                                               |
| ITD D835H                                                     | 1.06           | 0.42              | 3  |                                                                               |
| ITD D835I                                                     | 0.94           | 0.44              | 3  |                                                                               |
| ITD D835N                                                     | 0.88           | 0.29              | 3  |                                                                               |
| ITD D835V                                                     | 3.53           | 1.24              | 30 |                                                                               |
| ITD D835V D698N                                               | 31.10          | 0.43              | 3  |                                                                               |
| ITD D835V E778K                                               | 3.42           | 0.52              | 3  |                                                                               |
| ITD D835V E786K                                               | 1.82           | 0.35              | 3  |                                                                               |
| ITD D835V F691L                                               | 17.79          | 1.91              | 3  |                                                                               |
| ITD D835V G631R                                               | 5.51           | 0.59              | 3  |                                                                               |
| ITD D835V G669R                                               | 10.49          | 0.46              | 3  |                                                                               |
| ITD D835V G697S                                               | 99.86          | 14.71             | 3  |                                                                               |
| ITD D835V G822E                                               | 2.36           | 0.74              | 3  |                                                                               |
| ITD D835V G846D                                               | 4.65           | 1.32              | 3  |                                                                               |
| ITD D835V G846S                                               | 6.97           | 0.99              | 3  |                                                                               |
| ITD D835V M664I                                               | 2.48           | 0.94              | 3  |                                                                               |
| ITD D835V M855T                                               | 9.52           | 0.87              | 3  |                                                                               |
| ITD D835V S705N                                               | 2.49           | 0.26              | 3  |                                                                               |
| ITD D835V Y693C                                               | 34.18          | 3.87              | 3  |                                                                               |
| ITD D835V Y693N                                               | 32.96          | 3.65              | 3  |                                                                               |

|             |        |      |    |  |  |
|-------------|--------|------|----|--|--|
| ITD D835Y   | 1.13   | 0.29 | 3  |  |  |
| ITD D839A   | 3.48   | 1.62 | 3  |  |  |
| ITD D839G   | 2.47   | 0.12 | 3  |  |  |
| ITD D839H   | 3.38   | 0.48 | 3  |  |  |
| ITD D839N   | 2.90   | 1.31 | 3  |  |  |
| ITD E778K   | 3.88   | 0.51 | 3  |  |  |
| ITD E786K   | 2.16   | 0.41 | 3  |  |  |
| ITD F691L   | 25.35  | 4.74 | 24 |  |  |
| ITD G631R   | 4.02   | 0.64 | 3  |  |  |
| ITD G669R   | 6.62   | 1.19 | 3  |  |  |
| ITD G697S   | 117.80 | 6.10 | 3  |  |  |
| ITD G757E   | 1.62   | 0.23 | 3  |  |  |
| ITD G822E   | 2.83   | 0.52 | 3  |  |  |
| ITD G846D   | 8.91   | 2.11 | 3  |  |  |
| ITD G846R   | 1.80   | 1.18 | 3  |  |  |
| ITD G846S   | 8.40   | 2.17 | 3  |  |  |
| ITD H721Y   | 1.81   | 0.33 | 3  |  |  |
| ITD I836del | 5.39   | 1.75 | 3  |  |  |
| ITD K429E   | 6.02   | 0.67 | 3  |  |  |
| ITD M664I   | 2.19   | 1.00 | 3  |  |  |
| ITD M837I   | 1.60   | 0.56 | 3  |  |  |
| ITD M837K   | 2.04   | 0.49 | 3  |  |  |
| ITD M855T   | 7.11   | 1.54 | 3  |  |  |
| ITD N609T   | 3.52   | 0.72 | 3  |  |  |
| ITD N676K   | 3.57   | 1.06 | 3  |  |  |
| ITD N841H   | 1.84   | 0.74 | 3  |  |  |
| ITD N841I   | 4.94   | 0.45 | 3  |  |  |
| ITD N841K   | 1.30   | 0.20 | 3  |  |  |
| ITD N841T   | 3.47   | 0.92 | 3  |  |  |
| ITD N841Y   | 5.23   | 0.74 | 3  |  |  |
| ITD R834Q   | 3.77   | 2.31 | 3  |  |  |
| ITD R845G   | 3.65   | 2.33 | 3  |  |  |
| ITD S705N   | 2.24   | 0.49 | 3  |  |  |
| ITD Y693C   | 27.90  | 4.96 | 3  |  |  |
| ITD Y693N   | 23.76  | 4.11 | 3  |  |  |
| ITD Y842C   | 3.77   | 1.88 | 3  |  |  |
| ITD Y842H   | 3.03   | 0.90 | 3  |  |  |

**Table S2. Summary of FLT3 Inhibitor Mutagenesis Studies**

| <b>Drug</b>            | <b>Type 1<br/>or Type<br/>2<br/>Inhibitor</b> | <b>FLT3<br/>Mutation<br/>Background</b> | <b>Colonies<br/>Screened</b> | <b># Unique<br/>Resistant<br/>Mutations<br/>Identified</b> | <b># Predicted<br/>Mutations<br/>Acquired in<br/>Patients at<br/>Relapse</b> | <b>Reference</b>                    |
|------------------------|-----------------------------------------------|-----------------------------------------|------------------------------|------------------------------------------------------------|------------------------------------------------------------------------------|-------------------------------------|
| Quizartinib            | Type 2                                        | ITD                                     | 97                           | 5                                                          | 3                                                                            | Smith, et. al, Nature 2012          |
| PLX3397 (Pexadartinib) | Type 2                                        | ITD                                     | 78                           | 18                                                         | 4*                                                                           | Smith et. al, Cancer Discovery 2015 |
|                        |                                               | ITD/F691L                               | 117                          |                                                            |                                                                              |                                     |
| Ponatinib              | Type 2                                        | ITD                                     | 50                           | 6                                                          | N.D.                                                                         | Smith et. al, Blood 2013            |
| Crenolanib             | Type 1                                        | ITD                                     | N.S.                         | 3                                                          | 1                                                                            | Smith et. al, PNAS 2014             |
|                        |                                               | ITD/D835V                               | N.S.                         |                                                            |                                                                              |                                     |
| Gilteritinib           | Type 1                                        | ITD                                     | 64                           | 5                                                          | 1                                                                            | Current                             |
|                        |                                               | ITD/D835V                               | 72                           |                                                            |                                                                              |                                     |

N.S. = not stated. N.D. = not done. \*4 additional mutations occurred at amino acid sites predicted in mutagenesis screen.

**Table S3. Screening and End of Treatment FLT3 KD Mutations in Patients Relapsed on Gilteritinib**

| Subject No. | Initial Dose | Age/ Sex/ Race <sup>1</sup> / Weight | CR/CRh <sup>2</sup> | Best Overall Response <sup>2</sup> | Cytogenetic Risk Status | Timepoint                | Specimen Type | Blast (%) | Mutation | VAF (%) |
|-------------|--------------|--------------------------------------|---------------------|------------------------------------|-------------------------|--------------------------|---------------|-----------|----------|---------|
| 63          | 200 mg/day   | 70 Years/Female/W/79.2 kg            | Yes                 | CR                                 | Intermediate: normal    | SCREENING                | BONE MARROW   | 95        | ITD      | 38.59   |
|             |              |                                      |                     |                                    |                         | CYCLE 10 DAY 1 (Relapse) | BLOOD         | 7         |          | ND      |
| 70          | 200 mg/day   | 70 Years/Female/W/91.9 kg            | Yes                 | CR                                 | Intermediate: normal    | SCREENING                | BONE MARROW   | 88        | ITD      | 1.24    |
|             |              |                                      |                     |                                    |                         |                          |               |           | ITD      | 95.07   |
|             |              |                                      |                     |                                    |                         | EOT (Relapse)            | BONE MARROW   |           | ITD      | 42.94   |
| 97          | 200 mg/day   | 54 Years/Male/W/108.7 kg             | Yes                 | CR                                 | Intermediate: normal    | SCREENING                | BONE MARROW   | 33        | ITD      | 20.77   |
|             |              |                                      |                     |                                    |                         | EOT (Relapse)            | BONE MARROW   |           | ITD      | 7.19    |
| 146         | 120 mg/day   | 57 Years/Female/B/54.8 kg            | Yes                 | CR                                 |                         | SCREENING                | BONE MARROW   | 3         | ITD      | 2.01    |
|             |              |                                      |                     |                                    |                         | CYCLE 17 DAY 1 (Relapse) | BONE MARROW   | 3         | ITD      | 1.58    |
| 201         | 120 mg/day   | 82 Years/Female/W/95.3 kg            | Yes                 | CR                                 |                         | SCREENING                | BLOOD         | 14        | ITD      | 7.99    |
|             |              |                                      |                     |                                    |                         |                          |               |           | ITD      | 28.21   |
|             |              |                                      |                     |                                    |                         |                          |               |           | p.F349L  | 49.67   |
|             |              |                                      |                     |                                    |                         | EOT (Relapse)            | BLOOD         | 29        | ITD      | 8.78    |
|             |              |                                      |                     |                                    |                         |                          |               |           | p.F349L  | 48.05   |
| 86          | 200 mg/day   | 24 Years/Female/W/54.2 kg            | No                  | CRp                                | Intermediate: normal    | SCREENING                | BONE MARROW   | 70        | ITD      | 90.15   |
|             |              |                                      |                     |                                    |                         | CYCLE 7 DAY 1 (Relapse)  | BONE MARROW   |           | ITD      | 94.84   |

|     |            |                              |     |     |                      |                         |             |    |         |       |
|-----|------------|------------------------------|-----|-----|----------------------|-------------------------|-------------|----|---------|-------|
| 96  | 120 mg/day | 27 Years/ Female/ W/ 48.5 kg | No  | CRp | Intermediate: normal | SCREENING               | BONE MARROW | 79 | ITD     | 47.18 |
|     |            |                              |     |     |                      | CYCLE 7 DAY 1 (Relapse) | BONE MARROW | 78 | ITD     | 45.87 |
| 124 | 200 mg/day | 61 Years/ Female/ W/ 53.7 kg | Yes | CRp | Intermediate: normal | SCREENING               | BONE MARROW | 33 | ITD     | 73.98 |
|     |            |                              |     |     |                      | EOT (Relapse)           | BONE MARROW | 7  | ITD     | 66.05 |
| 12  | 120 mg/day | 76 Years/ Female/ W/ 70.9 kg | No  | CRi | Intermediate: normal | SCREENING               | BONE MARROW | 68 | ITD     | 77.62 |
|     |            |                              |     |     |                      | EOT (Relapse)           | BLOOD       | 56 |         | ND    |
| 24  | 200 mg/day | 59 Years/ Female/ W/ 60.3 kg | No  | CRi |                      | SCREENING               | BONE MARROW | 88 | ITD     | 84.18 |
|     |            |                              |     |     |                      | CYCLE 3 DAY 1 (Relapse) | BONE MARROW | 2  | ITD     | 60.72 |
| 25  | 200 mg/day | 39 Years/ Male/ W/ 67.3 kg   | No  | CRi |                      | SCREENING               | BONE MARROW | 96 | ITD     | 98.04 |
|     |            |                              |     |     |                      |                         |             |    | p.D835Y | 25.11 |
|     |            |                              |     |     |                      | CYCLE 3 DAY 1 (Relapse) | BONE MARROW | 6  | ITD     | 88.79 |
|     |            |                              |     |     |                      |                         |             |    | p.D835H | 22.85 |
| 44  | 80 mg/day  | 51 Years/ Male/ W/ 90.9 kg   | No  | CRi | Intermediate: normal | SCREENING               | BONE MARROW | 81 | ITD     | 63.41 |
|     |            |                              |     |     |                      | EOT (Relapse)           | BLOOD       | 30 | ITD     | 54.91 |
|     |            |                              |     |     |                      |                         |             |    | p.N609T | 0.86  |
| 62  | 200 mg/day | 22 Years/ Female/ W/ 53.6 kg | No  | CRi | Intermediate: normal | SCREENING               | BLOOD       | 79 | ITD     | 41.03 |
|     |            |                              |     |     |                      |                         |             |    | p.D835Y | 16.60 |
|     |            |                              |     |     |                      | CYCLE 6 DAY 1 (Relapse) | BLOOD       | 1  | ITD     | 0.87  |
| 106 | 120 mg/day | 69 Years/ Male/ W/ 87.1 kg   | No  | CRi | Intermediate: normal | SCREENING               | BONE MARROW | 78 | ITD     | 79.96 |
|     |            |                              |     |     |                      | EOT (Relapse)           | BONE MARROW | 9  | ITD     | 43.84 |

|     |            |                               |     |     |                      |                         |             |    |         |       |
|-----|------------|-------------------------------|-----|-----|----------------------|-------------------------|-------------|----|---------|-------|
| 121 | 80 mg/day  | 67 Years/ Male/ W/ 91.6 kg    | No  | CRi | Intermediate: normal | SCREENING               | BONE MARROW | 2  | ITD     | 26.77 |
|     |            |                               |     |     |                      |                         |             |    | p.D835Y | 3.33  |
|     |            |                               |     |     |                      | EOT (Relapse)           | BLOOD       | 4  | ITD     | 29.60 |
|     |            |                               |     |     |                      |                         |             |    | p.F691L | 5.39  |
|     |            |                               |     |     |                      |                         |             |    | p.D835Y | 7.85  |
| 125 | 120 mg/day | 71 Years/ Female/ W/ 71.2 kg  | Yes | CRi | Intermediate: normal | SCREENING               | BONE MARROW | 97 | ITD     | 97.45 |
|     |            |                               |     |     |                      | EOT (Relapse)           | BLOOD       | 18 | ITD     | 98.99 |
| 138 | 120 mg/day | 84 Years/ Male/ W/ 83.9 kg    | Yes | CRi | Intermediate: +8     | SCREENING               | BONE MARROW | 56 | ITD     | 65.30 |
|     |            |                               |     |     |                      |                         |             |    | p.D835H | 18.51 |
|     |            |                               |     |     |                      | CYCLE 8 DAY 1 (Relapse) | BLOOD       | 14 | ITD     | 40.60 |
|     |            |                               |     |     |                      |                         |             |    | p.F691L | 2.16  |
|     |            |                               |     |     |                      |                         |             |    | p.F691L | 4.90  |
| 142 | 120 mg/day | 30 Years/ Female/ W/ 124.1 kg | Yes | CRi | Favorable: inv(16)   | SCREENING               | BONE MARROW | 58 | ITD     | 48.71 |
|     |            |                               |     |     |                      | EOT (Relapse)           | BLOOD       | 22 | ITD     | 28.14 |
|     |            |                               |     |     |                      |                         |             |    | p.F691L | 4.09  |
| 178 | 200 mg/day | 68 Years/ Male/ W/ 106.2 kg   | No  | CRi |                      | SCREENING               | BLOOD       | 82 | ITD     | 37.95 |
|     |            |                               |     |     |                      |                         |             |    | p.D835H | 0.87  |
|     |            |                               |     |     |                      | EOT (Relapse)           | BONE MARROW | 3  | ITD     | 16.62 |
|     |            |                               |     |     |                      |                         |             |    | p.D835H | 10.88 |
| 209 | 120 mg/day | 52 Years/ Female/ W/ 56.7 kg  | Yes | CRi | Intermediate: normal | SCREENING               | BONE MARROW | 2  | ITD     | 10.90 |
|     |            |                               |     |     |                      |                         |             |    | p.D835Y | 0.67  |
|     |            |                               |     |     |                      | EOT (Relapse)           | BLOOD       | 8  |         | ND    |
| 227 | 200 mg/day | 60 Years/ Female/ W/ 55.2 kg  | No  | CRi | Favorable: inv(16)   | SCREENING               | BONE MARROW | 95 | p.D835Y | 40.42 |
|     |            |                               |     |     |                      | EOT (Relapse)           | BONE MARROW | 67 |         | ND    |
| 58  | 120 mg/day | 78 Years/ Female/ W/ 65.9 kg  | No  | PR  | Intermediate: normal | SCREENING               | BONE MARROW | 61 | ITD     | 35.44 |

|     |               |                                    |    |    |                         |                               |                |    |         |       |
|-----|---------------|------------------------------------|----|----|-------------------------|-------------------------------|----------------|----|---------|-------|
|     |               |                                    |    |    |                         | CYCLE 3<br>DAY<br>1 (Relapse) | BONE<br>MARROW | 18 | ITD     | 46.05 |
| 21  | 120<br>mg/day | 52<br>Years/ Female/ W/ 46.3<br>kg | No | NR |                         | SCREENING                     | BONE<br>MARROW | 90 | ITD     | 80.64 |
|     |               |                                    |    |    |                         | EOT (Relapse)                 | BONE<br>MARROW | 23 | p.D835Y | 5.01  |
| 51  | 40<br>mg/day  | 73 Years/ Male/ W/ 88.6<br>kg      | No | NR | Unfavorable:<br>complex | SCREENING                     | BONE<br>MARROW | 88 | ITD     | 48.44 |
|     |               |                                    |    |    |                         |                               |                |    | p.D835Y | 2.98  |
|     |               |                                    |    |    |                         | EOT (Relapse)                 | BONE<br>MARROW | 68 | ITD     | 53.12 |
|     |               |                                    |    |    |                         |                               |                |    | p.F691L | 7.31  |
|     |               |                                    |    |    |                         |                               |                |    | p.F691L | 10.70 |
| 72  | 200<br>mg/day | 67<br>Years/ Female/ W/ 45.8<br>kg | No | NR | Unfavorable:<br>complex | SCREENING                     | BONE<br>MARROW | 88 | ITD     | 38.15 |
|     |               |                                    |    |    |                         | CYCLE 5<br>DAY<br>1 (Relapse) | BONE<br>MARROW | 22 |         | ND    |
| 87  | 120<br>mg/day | 69 Years/ Male/ W/ 92.1<br>kg      | No | NR | Intermediate:<br>normal | SCREENING                     | BONE<br>MARROW | 89 | ITD     | 0.71  |
|     |               |                                    |    |    |                         |                               |                |    | ITD     | 88.62 |
|     |               |                                    |    |    |                         | EOT (Relapse)                 | BLOOD          | 33 | ITD     | 90.83 |
| 118 | 120<br>mg/day | 68<br>Years/ Female/ W/ 84.5<br>kg | No | NR | Intermediate:<br>normal | SCREENING                     | BONE<br>MARROW | 91 | ITD     | 47.66 |
|     |               |                                    |    |    |                         | EOT (Relapse)                 | BONE<br>MARROW | 73 |         | ND    |
| 186 | 200<br>mg/day | 45<br>Years/ Female/ W/ 59.5<br>kg | No | NR | Intermediate:<br>normal | SCREENING                     | BONE<br>MARROW |    | ITD     | 6.41  |
|     |               |                                    |    |    |                         |                               |                |    | p.D835H | 1.01  |
|     |               |                                    |    |    |                         | EOT (Relapse)                 | BLOOD          | 19 |         | ND    |
| 220 | 120<br>mg/day | 59 Years/ Male/ W/ 77.0<br>kg      | No | NR | Intermediate:<br>normal | SCREENING                     | BONE<br>MARROW | 22 | ITD     | 10.43 |
|     |               |                                    |    |    |                         | CYCLE 4<br>DAY<br>1 (Relapse) | BONE<br>MARROW | 27 |         | ND    |
| 243 | 200<br>mg/day | 79 Years/ Male/ W/ 75.0<br>kg      | No | NR | Unfavorable:<br>del7q   | SCREENING                     | BONE<br>MARROW | 91 | ITD     | 21.50 |
|     |               |                                    |    |    |                         |                               |                |    | ITD     | 69.29 |
|     |               |                                    |    |    |                         | EOT (Relapse)                 | BLOOD          | 51 | ITD     | 30.37 |



|     |               |                                    |    |    |                         |                               |       |    |         |       |
|-----|---------------|------------------------------------|----|----|-------------------------|-------------------------------|-------|----|---------|-------|
|     |               |                                    |    |    |                         |                               |       |    | ITD     | 49.01 |
|     |               |                                    |    |    |                         |                               |       |    | ITD     | 0.72  |
| 248 | 200<br>mg/day | 35<br>Years/ Female/ W/ 63.0<br>kg | No | NR | Unfavorable:<br>complex | SCREENING                     | BLOOD | 1  | ITD     | 21.62 |
|     |               |                                    |    |    |                         |                               |       |    | p.D835Y | 4.39  |
|     |               |                                    |    |    |                         | CYCLE 2<br>DAY<br>1 (Relapse) | BLOOD | 15 | ITD     | 15.15 |
|     |               |                                    |    |    |                         |                               |       |    | p.D835Y | 1.65  |

<sup>1</sup>Race: W-White.

<sup>2</sup>CR: complete remission, CRp: complete remission with incomplete platelet recovery, CRi: complete remission with incomplete hematological recovery, CRh: complete remission with partial hematological recovery, PR: partial response, NR: no response, NE: not evaluable.

EOT: end of treatment, VAF: variant frequency

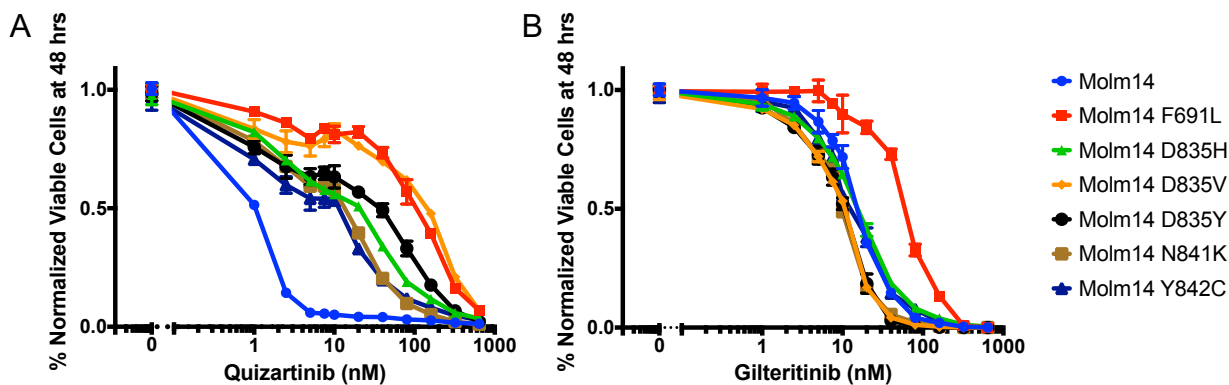

C

| Cell Line       | Quizartinib |           | Gilteritinib |           |
|-----------------|-------------|-----------|--------------|-----------|
|                 | IC50 (nM)   | Std. Dev. | IC50 (nM)    | Std. Dev. |
| Molm14 Parental | 0.53        | 0.03      | 13.39        | 0.29      |
| Molm14 D835H    | 19.8        | 0.66      | 14.16        | 0.53      |
| Molm14 D835V    | 144.13      | 11.98     | 8.89         | 1.04      |
| Molm14 D835Y    | 49.75       | 6.7       | 8.49         | 0.84      |
| Molm14 F691L    | 122.87      | 26.07     | 42.16        | 6.11      |
| Molm14 N841K    | 12.88       | 1.06      | 8.04         | 0.77      |
| Molm14 Y842C    | 10.94       | 1.29      | 12.18        | 1.22      |

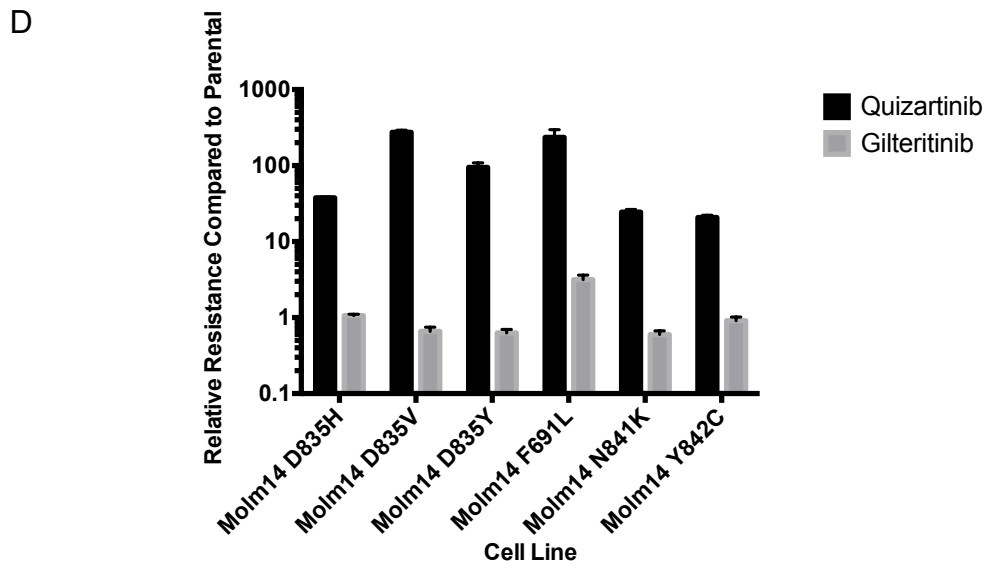

**Figure S1. Gilteritinib Has Activity Against Quizartinib-Resistant Molm14 cell lines .** Normalized cell viability of Molm14 cells containing indicated FLT3 mutations the after 48 hours in various concentrations of (A) quizartinib (B) gilteritinib (error bars represent s.d. of triplicates from the same experiment). (C) Calculated inhibitory concentration 50 (IC50) of quizartinib and gilteritinib in Molm14 FLT3 mutant cell lines. (D) Relative resistance of indicated Molm14 mutant cell lines compared to parental Molm14 (IC50 of mutant/IC50 of parental) in the presence quizartinib and gilteritinib. (error bars represent s.d. of triplicate experiments).

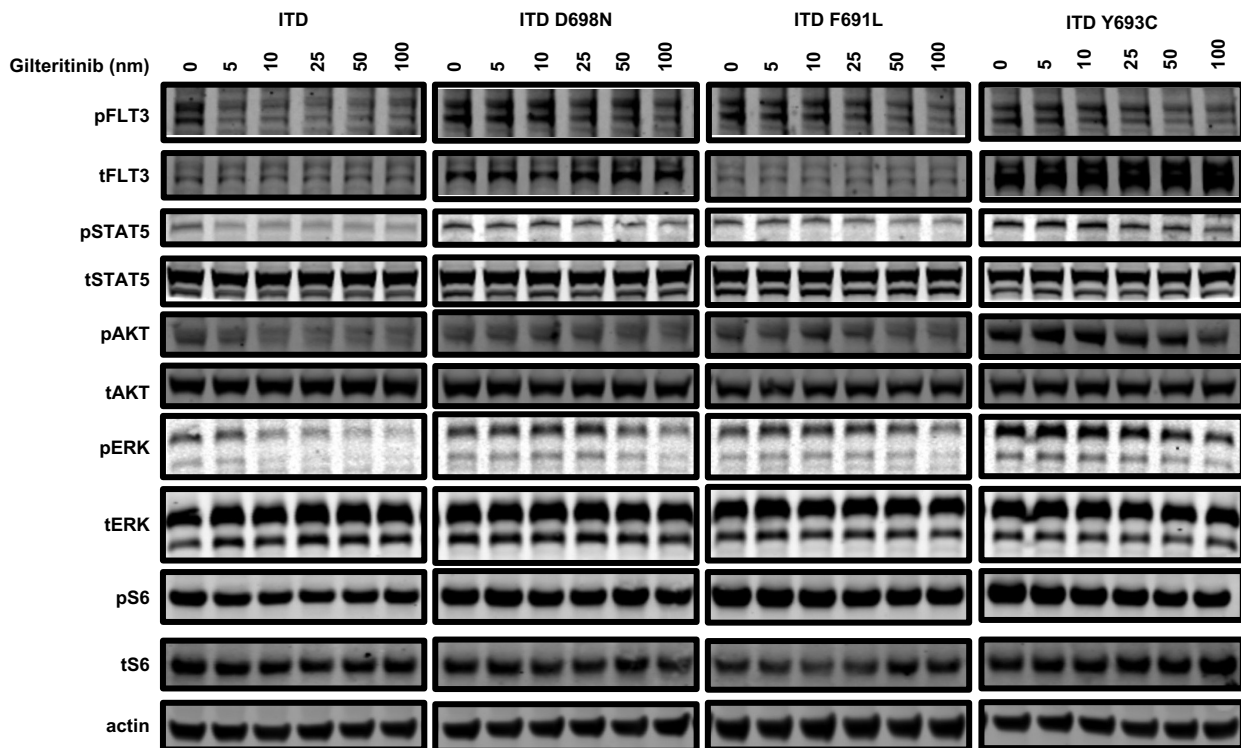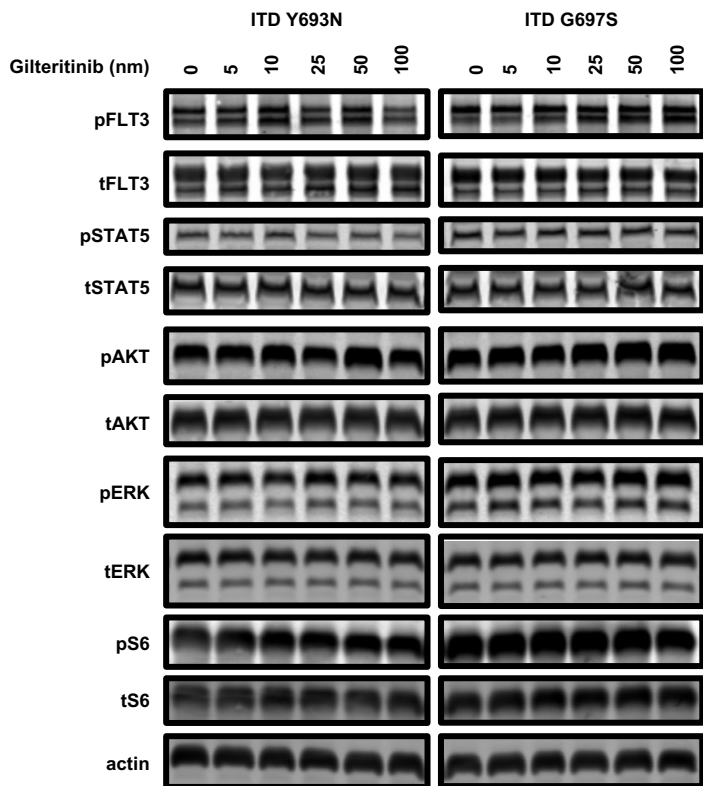

**Figure S2.** Western blot analysis using anti-phospho-FLT3 and anti-FLT3 antibody performed on lysates from IL-3-independent Ba/F3 populations expressing the FLT3-ITD mutant isoforms indicated. Cells were exposed to gilteritinib at the indicated concentrations for 90 minutes.

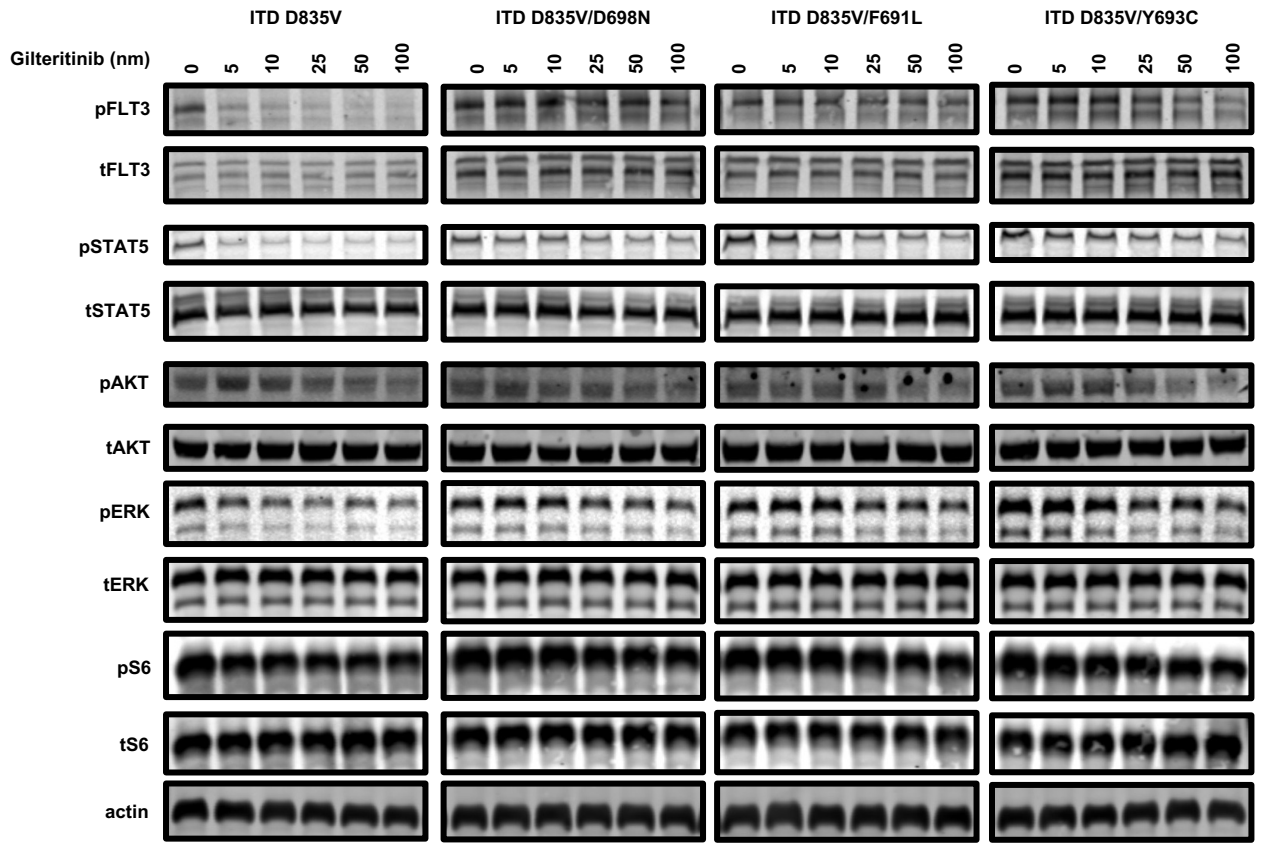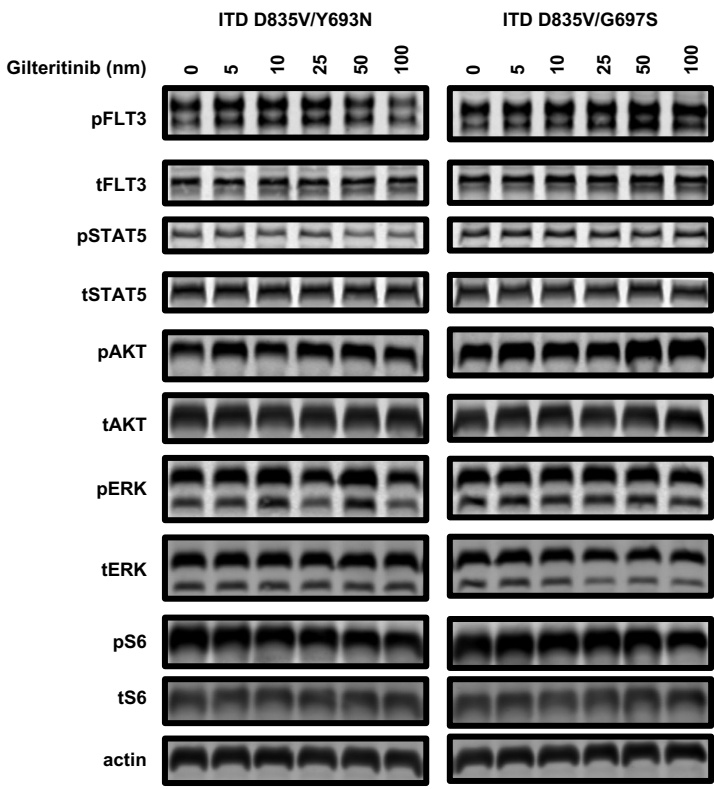

**Figure S3.** Western blot analysis using anti-phospho-FLT3 and anti-FLT3 antibody performed on lysates from IL-3-independent Ba/F3 populations expressing the FLT3-ITD/D835V mutant isoforms indicated. Cells were exposed to gilteritinib at the indicated concentrations for 90 minutes.
